# Supplementary material
Source: PubMed Central journal article supplement (PMC6400268)
Supplement: NIHMS82003-supplement-Supplementary_tables.pdf [file NIHMS82003-supplement-Supplementary_tables.pdf]

**Supplementary table 1 Median and mean values of the total erosion score in MCP- and MTP-joints**

|              | RA            | Symptom-free control | Other arthritides |
|--------------|---------------|----------------------|-------------------|
| Median (IQR) | 1.0 (0.4-2.5) | 0.5 (0-1.5)          | 1.0 (0-2.0)       |
| <40 years    | 0.5 (0-1.3)   | 0 (0-0.5)            | 0 (0-0.9)         |
| 40-59 years  | 0.5 (0-1.4)   | 0.5 (0-1.0)          | 1 (0-2.0)         |
| ≥60 years    | 2.0 (1.0-3.5) | 1.5 (0.5-2.5)        | 1.5 (0.5-3.0)     |
| Mean (SD)    | 1.8 (2.4)     | 0.9 (1.2)            | 1.3 (1.5)         |
| <40 years    | 1.0 (1.2)     | 0.3 (0.5)            | 0.4 (0.6)         |
| 40-59 years  | 1.2 (1.8)     | 0.8 (1.0)            | 1.2 (1.3)         |
| ≥60 years    | 2.5 (2.9)     | 1.7 (1.5)            | 1.9 (1.8)         |

Presented are the median and mean total erosion scores in MCP- en MTP-joints for RA-patients, symptom-free controls and patients with other arthritides, within different age groups. RA, rheumatoid arthritis; IQR, interquartile range; SD, standard deviation.

**Supplementary table 2 Frequencies of erosions with score  $\geq 2$  in the MCP- and MTP-joints of RA-patients and symptom free controls, depicted per age category (18-39, 40-59,  $\geq 60$  years)**

| Erosions |          | <40 years |         | 40-59 years |         | $\geq 60$ years |         | Percentage                                                                           |
|----------|----------|-----------|---------|-------------|---------|-----------------|---------|--------------------------------------------------------------------------------------|
|          |          | RA        | Control | RA          | Control | RA              | Control |                                                                                      |
|          |          | n=33      | n=51    | n=96        | n=90    | n=109           | n=52    |                                                                                      |
| MCP 2    | proximal | 0         | 0       | 0           | 0       | 3               | 0       |  |
|          | distal   | 0         | 0       | 0           | 0       | 0               | 0       |                                                                                      |
| MCP 3    | proximal | 3         | 0       | 2           | 1       | 3               | 2       |                                                                                      |
|          | distal   | 0         | 0       | 0           | 0       | 0               | 0       |                                                                                      |
| MCP 4    | proximal | 0         | 0       | 0           | 0       | 0               | 0       |                                                                                      |
|          | distal   | 0         | 0       | 0           | 0       | 0               | 0       |                                                                                      |
| MCP 5    | proximal | 0         | 0       | 0           | 0       | 0               | 0       |                                                                                      |
|          | distal   | 0         | 0       | 0           | 0       | 0               | 0       |                                                                                      |
| MTP 1    | proximal | 0         | 0       | 0           | 0       | 3               | 0       |                                                                                      |
|          | distal   | 0         | 0       | 0           | 0       | 1               | 0       |                                                                                      |
| MTP 2    | proximal | 0         | 0       | 1           | 0       | 0               | 0       |                                                                                      |
|          | distal   | 0         | 0       | 0           | 0       | 1               | 0       |                                                                                      |
| MTP 3    | proximal | 0         | 0       | 2           | 0       | 1               | 0       |                                                                                      |
|          | distal   | 0         | 0       | 0           | 0       | 0               | 0       |                                                                                      |
| MTP 4    | proximal | 0         | 0       | 0           | 0       | 0               | 0       |                                                                                      |
|          | distal   | 0         | 0       | 0           | 0       | 0               | 0       |                                                                                      |
| MTP 5    | proximal | 6         | 0       | 1           | 0       | 3               | 0       |                                                                                      |
|          | distal   | 0         | 0       | 1           | 0       | 1               | 0       |                                                                                      |

Values are the percentages of persons with an erosion score of at least 2 of all persons in that age category. RA, rheumatoid arthritis; MCP, metacarpophalangeal joint; MTP, metatarsophalangeal joint.

**Supplementary table 3 Frequencies of RA-patients and patients with other arthritides with grade  $\geq 2$  erosions and with erosions with the simultaneous presence of local inflammation in an MCP and/or MTP-joint; analyses on person level**

|                              |                         | Nr. of persons<br>with erosions | Grade $\geq 2$ erosions       |                            | Erosions with inflammation |                           |
|------------------------------|-------------------------|---------------------------------|-------------------------------|----------------------------|----------------------------|---------------------------|
|                              |                         |                                 | No grade $\geq 2$<br>erosions | Grade $\geq 2$<br>erosions | Erosion+<br>inflammation-  | Erosion+<br>inflammation+ |
| <b>RA</b>                    | <40 years (n=33)        | 14                              | 11 (79%)                      | 3 (21%)                    | 3 (21%)                    | 11 (79%)                  |
|                              | 40-59 years (n=96)      | 39                              | 34 (87%)                      | 5 (13%)                    | 16 (41%)                   | 23 (59%)                  |
|                              | $\geq 60$ years (n=109) | 79                              | 68 (86%)                      | 11 (14%)                   | 18 (23%)                   | 61 (56%)                  |
|                              |                         | 238                             |                               |                            |                            |                           |
| <b>other<br/>arthritides</b> | <40 years (n=68)        | 17                              | 17 (100%)                     | 0 (0%)                     | 7 (41%)                    | 10 (59%)                  |
|                              | 40-59 years (n=146)     | 74                              | 68 (92%)                      | 6 (8%)                     | 29 (39%)                   | 45 (61%)                  |
|                              | $\geq 60$ years (n=137) | 99                              | 93 (94%)                      | 6 (6%)                     | 29 (29%)                   | 70 (71%)                  |
|                              | 351                     |                                 |                               |                            |                            |                           |

The presence of grade  $\geq 2$  erosions and erosions with inflammation (BME and/or synovitis) was evaluated per MCP- and MTP-bone according to the Rheumatoid Arthritis Magnetic Resonance Imaging Scoring system. Grade  $\geq 2$  indicate that  $>10\%$  of the bone is eroded. The presence of BME and/or synovitis was defined as a score of  $\geq 1$ . BME, bone marrow edema; RA, rheumatoid arthritis; MCP, metacarpophalangeal joint; MTP, metatarsophalangeal joint.

**Supplementary table 4 Location of erosions in bones of the MCP- and MTP-joints of RA-patients and patients with other arthritides, depicted per age category (18-39, 40-59, ≥60 years)**

| Erosions |          | <40 years |                   | 40-59 years |                   | ≥60 years |                   |
|----------|----------|-----------|-------------------|-------------|-------------------|-----------|-------------------|
|          |          | RA        | other arthritides | RA          | other arthritides | RA        | other arthritides |
|          |          | n=38      | n=63              | n=112       | n=130             | n=134     | n=112             |
| MCP 2    | proximal | 5         | 2                 | 10          | 6                 | 22        | 26                |
|          | distal   | 0         | 0                 | 4           | 2                 | 9         | 8                 |
| MCP 3    | proximal | 8         | 8                 | 16          | 22                | 31        | 26                |
|          | distal   | 0         | 2                 | 0           | 0                 | 4         | 5                 |
| MCP 4    | proximal | 5         | 0                 | 3           | 4                 | 8         | 6                 |
|          | distal   | 3         | 0                 | 0           | 0                 | 0         | 4                 |
| MCP 5    | proximal | 0         | 2                 | 5           | 5                 | 18        | 14                |
|          | distal   | 0         | 2                 | 1           | 0                 | 2         | 1                 |
| MTP 1    | proximal | 16        | 8                 | 21          | 22                | 36        | 34                |
|          | distal   | 0         | 6                 | 2           | 2                 | 10        | 9                 |
| MTP 2    | proximal | 0         | 2                 | 2           | 2                 | 3         | 3                 |
|          | distal   | 3         | 0                 | 0           | 1                 | 4         | 1                 |
| MTP 3    | proximal | 0         | 0                 | 2           | 1                 | 4         | 1                 |
|          | distal   | 0         | 0                 | 0           | 2                 | 1         | 1                 |
| MTP 4    | proximal | 3         | 0                 | 3           | 2                 | 1         | 0                 |
|          | distal   | 0         | 0                 | 0           | 0                 | 0         | 1                 |
| MTP 5    | proximal | 21        | 0                 | 11          | 10                | 15        | 10                |
|          | distal   | 0         | 0                 | 2           | 0                 | 1         | 0                 |

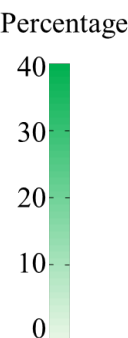

Values are the percentages of patients with an erosion of all patients in that age category. The presence of an erosion is defined as an erosion score of at least 1 in that bone. RA, rheumatoid arthritis; MCP, metacarpophalangeal joint; MTP, metatarsophalangeal joint.
